# Supplementary material
Source: PubMed Central journal article supplement (PMC3081413)

**Supplementary Table 1. Data collection, phase determination and refinement statistics**

|                                           | Native 1 (with Cmpd2) | Native 2-Cmpd1      | Peak                | Inflection          | SeMet-Cmpd1         |
|-------------------------------------------|-----------------------|---------------------|---------------------|---------------------|---------------------|
| <b>Data collection</b>                    | APS 24-ID-C           | APS 24-ID-C         | APS 24-ID-C         | APS 24-ID-C         | APS 24-ID-C         |
| Wavelength (Å)                            | 0.97922               | 0.97922             | 0.97916             | 0.97933             | 0.96394             |
| Space group                               | P1                    | I4 <sub>1</sub> 22  | I4 <sub>1</sub> 22  | I4 <sub>1</sub> 22  | I4 <sub>1</sub> 22  |
| Resolution (Å)                            | 30.0-3.6 (3.66-3.6)   | 30.0-4.0 (4.07-4.0) | 30.0-4.0 (4.07-4.0) | 30.0-4.0 (4.07-4.0) | 30.0-4.0 (4.07-4.0) |
| Observations                              | 90,090                | 15,817              | 15,861              | 15,804              | 15,750              |
| Redundancy                                | 1.9 (1.8)             | 6.9 (4.7)           | 12.5 (6.5)          | 12.4(6.5)           | 12.1(6.2)           |
| Data coverage (%)                         | 92.5 (76.6)           | 97.3 (86.3)         | 98.6 (93.3)         | 98.1 (90.8)         | 98.1 (89.0)         |
| I / $\sigma$                              | 9.2 (1.5)             | 25.3 (2.1)          | 24.7 (1.9)          | 23.3(1.9)           | 21.5(1.6)           |
| R <sub>sym</sub> (%)                      | 7.2 (40.5)            | 7.8 (36.5)          | 11.4 (47.3)         | 11.1 (48.7)         | 11.4 (50.3)         |
| <b>MAD Analysis</b>                       |                       |                     |                     |                     |                     |
| Resolution (Å)                            |                       |                     | 30-4.0              | 30-4.0              | 30-4.0              |
| Phasing power (anomalous)                 |                       |                     | 1.22                | 1.10                | 0.94                |
| R <sub>culis</sub> (anomalous)            |                       |                     | 0.87                | 0.88                | 0.92                |
| Mean FOM                                  |                       |                     | 0.519               |                     |                     |
| <b>Refinement</b>                         |                       |                     |                     |                     |                     |
| Resolution range (Å)                      | 15.0-3.6              | 15.0-4.0            |                     |                     |                     |
| No. reflections                           | 72,261                | 12,469              |                     |                     |                     |
| No. atoms                                 | 39,106                | 4,399               |                     |                     |                     |
| R (%)                                     | 30.7                  | 24.9                |                     |                     |                     |
| R <sub>free</sub> (%)                     | 34.1                  | 32.4                |                     |                     |                     |
| Mean B-factors (Å <sup>2</sup> ), overall | 192.4                 | 207.9               |                     |                     |                     |
| Mean B-factors (Å <sup>2</sup> ), Cmpd1   |                       | 259.9               |                     |                     |                     |
| R.m.s deviations                          |                       |                     |                     |                     |                     |
| Bonds (Å)                                 | 0.058                 | 0.043               |                     |                     |                     |
| Angles (°)                                | 2.53                  | 2.19                |                     |                     |                     |
| Ramachandran plot                         |                       |                     |                     |                     |                     |
| Most favored / allowed                    | 79.3% / 96.6%         | 74.2% / 94.5%       |                     |                     |                     |

Highest resolution shell is shown in parenthesis.

**Supplementary Table 2.** Additional crystallographic statistics

|                                 | SeMet                 | Ytterbium             |                       |                       |
|---------------------------------|-----------------------|-----------------------|-----------------------|-----------------------|
| <b>Data collection</b>          | Peak                  | Peak                  | Inflection            | Remote                |
| Beam line                       | APS 24-ID-C           | APS 24-ID-C           | APS 24-ID-C           | APS 24-ID-C           |
| Wavelength (Å)                  | 0.9792                | 1.3855                | 1.3860                | 1.3753                |
| Space group                     | P1                    | P1                    | P1                    | P1                    |
| Cell dimensions a, b, c (Å)     | 103.4, 140.5, 160.9   | 97.6, 141.8, 165.8    | 97.6, 141.8, 165.8    | 97.6, 141.9, 165.8    |
| $\alpha, \beta, \gamma$ (°)     | 71.4, 79.8, 86.0      | 69.3, 75.3, 87.9      | 69.3, 75.3, 87.9      | 69.3, 75.3, 87.9      |
| Resolution (Å)                  | 30 - 4.3 (4.45 - 4.3) | 30 - 4.1 (4.25 - 4.1) | 30 - 4.1 (4.25 - 4.1) | 30 - 4.1 (4.25 - 4.1) |
| Observations                    | 55,903                | 55,456                | 54,567                | 55,058                |
| Redundancy                      | 4.5 (4.4)             | 3.4 (3.0)             | 3.4 (3.0)             | 3.3 (3.0)             |
| Data coverage (%)               | 97.5 (95.4)           | 88.8 (70.9)           | 87.5 (68.2)           | 88.2 (69.3)           |
| I / $\sigma$                    | 15.0 (3.5)            | 11.8 (2.0)            | 11.3 (1.8)            | 10.8 (1.6)            |
| R <sub>sym</sub> (%)            | 12.2 (49.6)           | 12.1 (43.3)           | 12.0 (49.1)           | 12.3 (55.3)           |
| <b>MAD Analysis</b>             |                       |                       |                       |                       |
| Resolution (Å)                  |                       | 30 - 4.1              | 30 - 4.1              | 30 - 4.1              |
| Phasing power (anomalous)       |                       | 0.32                  | 0.26                  | -                     |
| R <sub>cullis</sub> (anomalous) |                       | 0.93                  | 0.94                  | 0.98                  |
| Mean FOM                        |                       | 0.25                  |                       |                       |

Highest resolution shell is shown in parenthesis.

**Supplementary Table 3.** Structural similarity among the 8 independent IKK $\beta$  copies in the P1 space group and with IKK $\beta$  in the I4 $_1$ 22 space group

| Reference chain | Alignment chain | R.M.S.D | # Residues aligned |
|-----------------|-----------------|---------|--------------------|
| A in P1         | B in P1         | 0.73    | 480 out of 622     |
|                 | C in P1         | 0.62    | 611 out of 622     |
|                 | D in P1         | 0.69    | 519 out of 622     |
|                 | E in P1         | 0.72    | 582 out of 622     |
|                 | F in P1         | 0.72    | 528 out of 622     |
|                 | G in P1         | 0.70    | 492 out of 541     |
|                 | H in P1         | 0.76    | 528 out of 541     |
|                 | A in I4 $_1$ 22 | 1.00    | 472 out of 541     |

**Supplementary Figure 1.** Structural formulas of the IKK $\beta$  inhibitors Cmpd1 and Cmpd2. The piperazine ring, the first phenyl ring, the pyrimidine ring and the second phenyl ring are labeled with A, B, C and D, respectively.

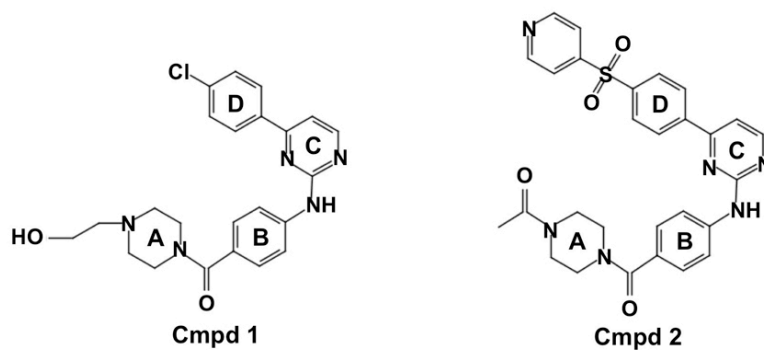

**Supplementary Figure 2.** MAD experimental electron density map in the I<sub>4</sub>22 space group (left) and 2Fo-Fc map in the P1 space group (right), contoured at 1.5  $\sigma$  (cyan) and superimposed with the trace of the final model (yellow)

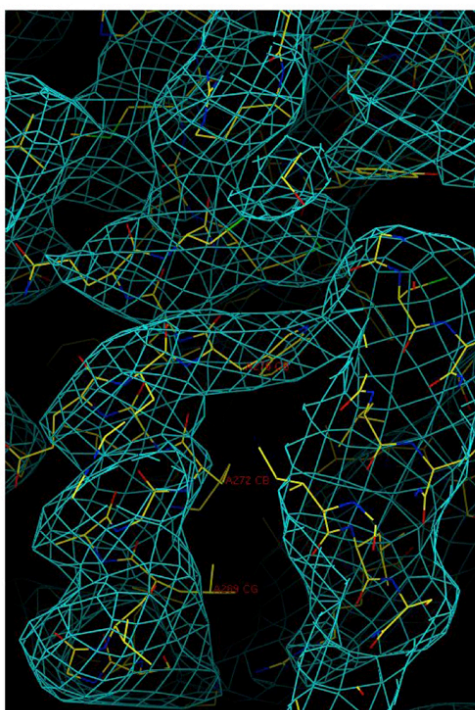

**MAD map of I<sub>4</sub>22**

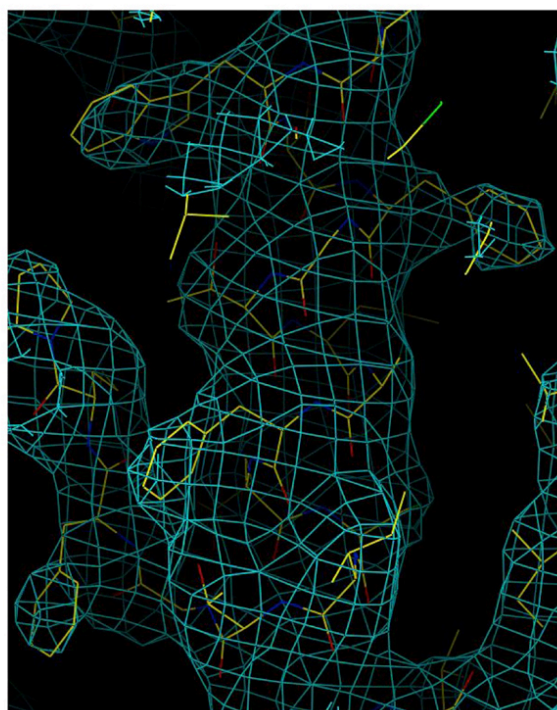

**2Fo-Fc map of P1**

**Supplementary Figure 3.** Superposition among the 8 independent copies of  $\alpha$ IKK $\beta$  in the P1 structure (a) and between one copy of  $\alpha$ IKK $\beta$  in the P1 structure (green) and the I4<sub>122</sub> structure (black) (b).

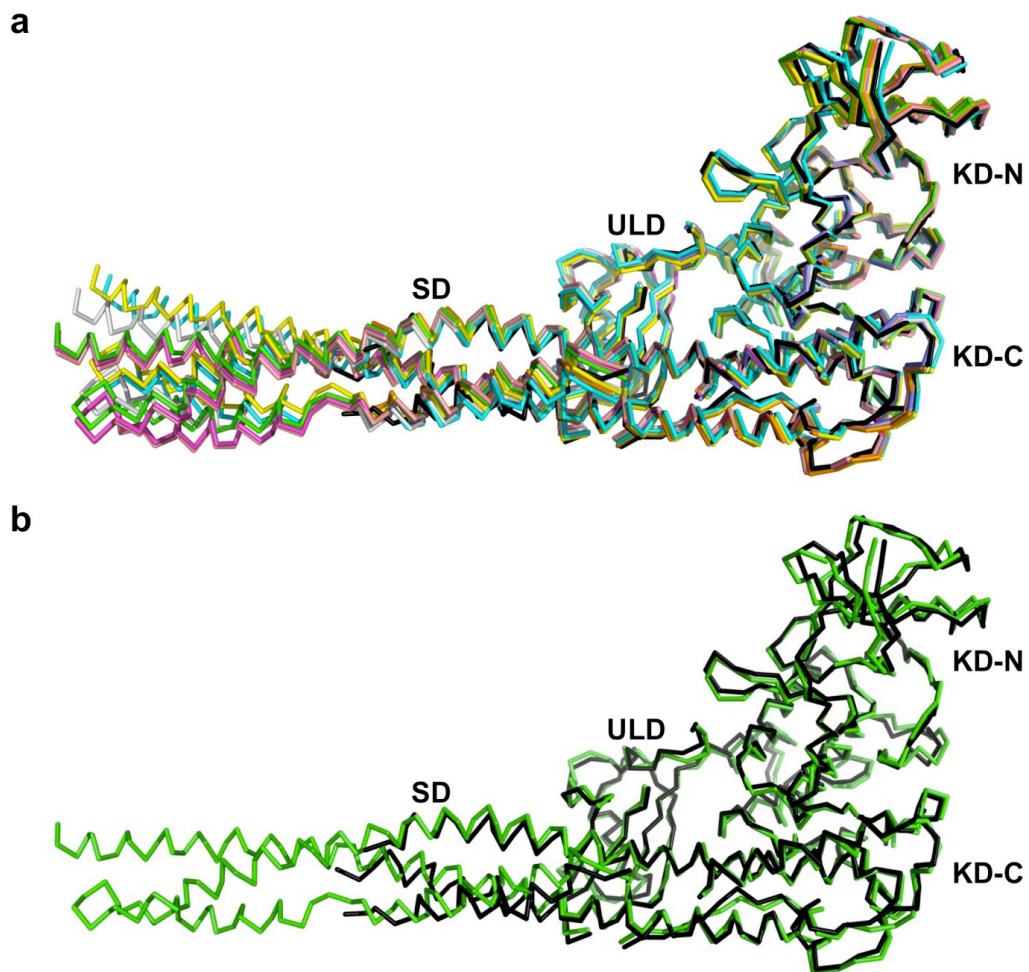

**Supplementary Figure 4. Sequence alignment of IKK $\beta$  orthologues, human IKK $\alpha$  and mouse PKA.** hIKK $\beta$ : human IKK $\beta$ ; mIKK $\beta$ : mouse IKK $\beta$ ; oIKK $\beta$ : opossum IKK $\beta$ ; xIKK $\beta$ : *Xenopus laevis* IKK $\beta$ ; cIKK $\beta$ : chicken IKK $\beta$ ; hIKK $\alpha$ : human IKK $\alpha$ ; mPKA: mouse PKA. Conserved residues are highlighted in yellow.  $\beta$ -stands are indicated with arrows and  $\alpha$ -helices are shown in cylinders, with orange for KD-N, yellow for KD-C, magenta for ULD and blue for SDD. The two MAPKK consensus activation loop Ser residues S177 and S181 are indicated by red dots above the alignment. Conserved catalytic residues are indicated with black triangles. Residues on the KD-SDD interface, the ULD-SDD interface, and the ULD-KD interface are indicated with orange diamonds, blue dots and green crosses, respectively. Residues at the dimerization interface are shown as red arrows. Buried residues in the ULD domain are indicated with magenta dots on the bottom.

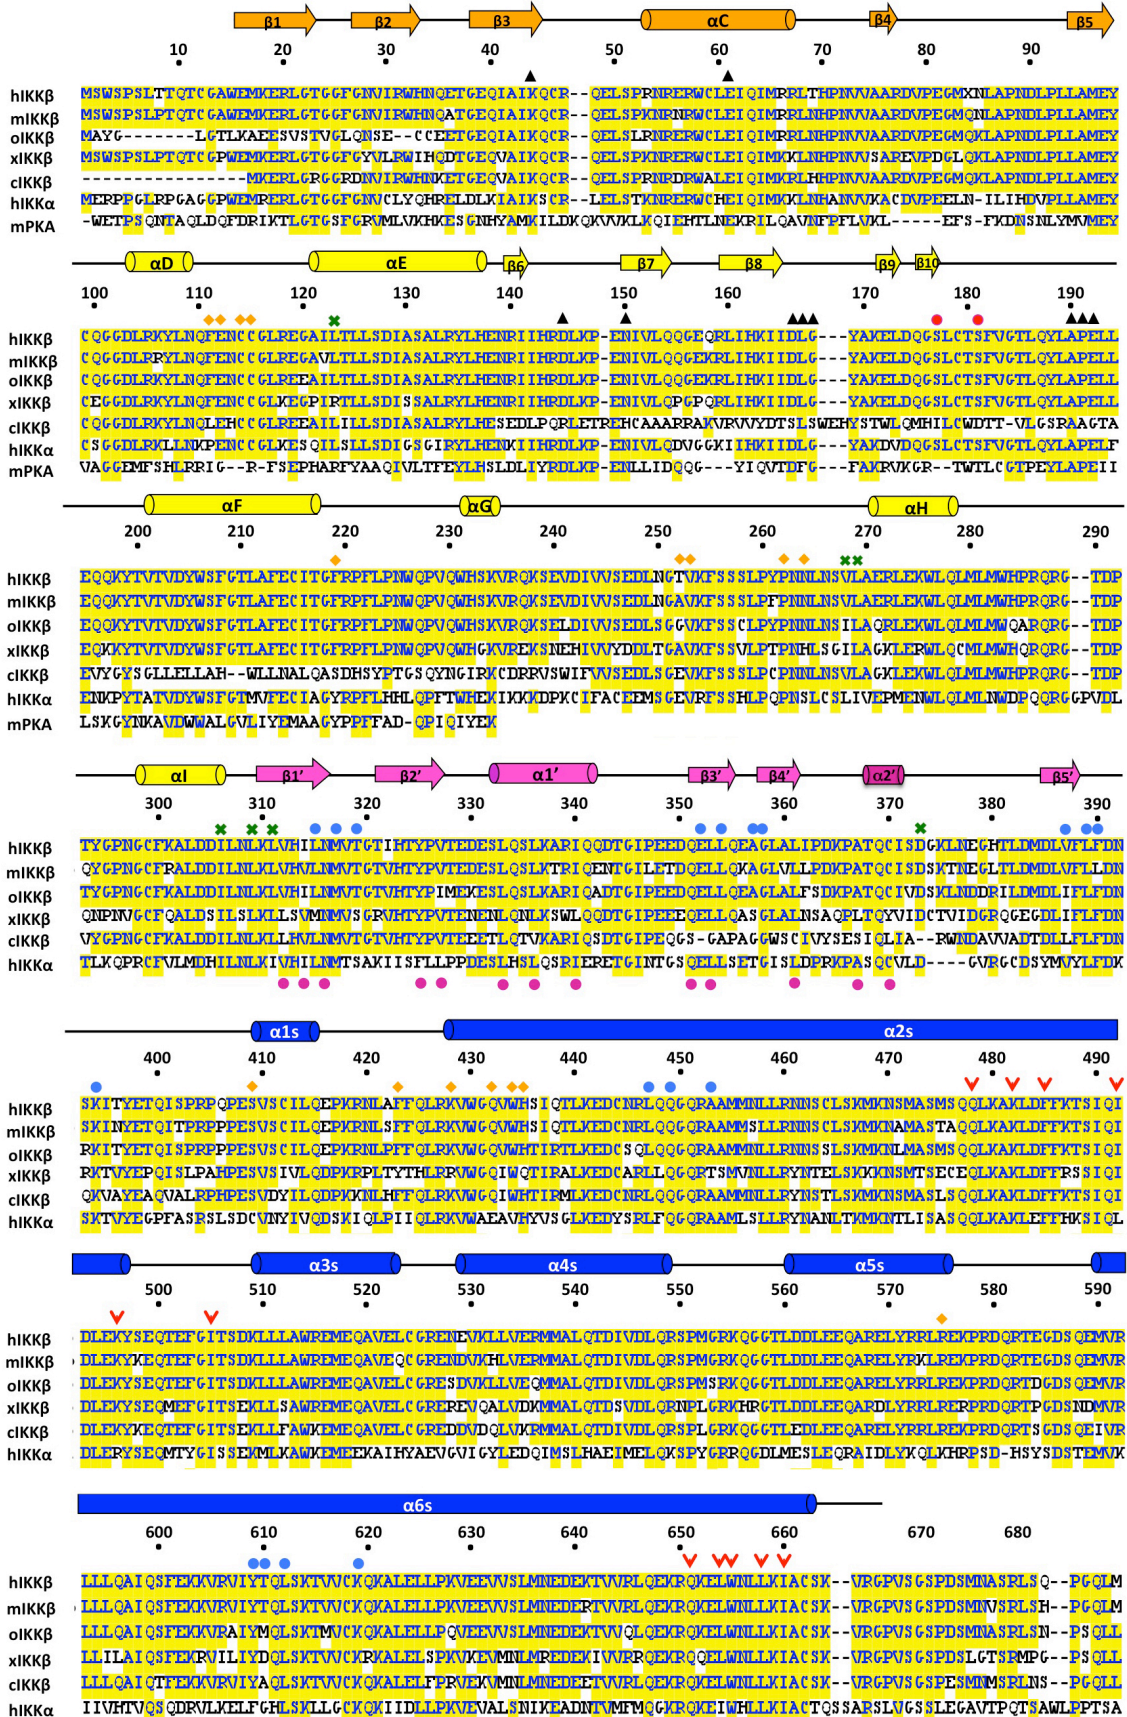

**Supplementary Figure 5.** Alignment between ULD and Ub, showing the three conserved hydrophobic residues and residues at the interface with SDD

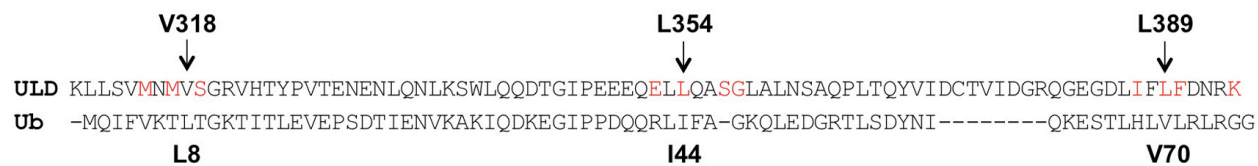

**Supplementary Figure 6.** MAD map at 1.0  $\sigma$  in the I4<sub>1</sub>22 space group

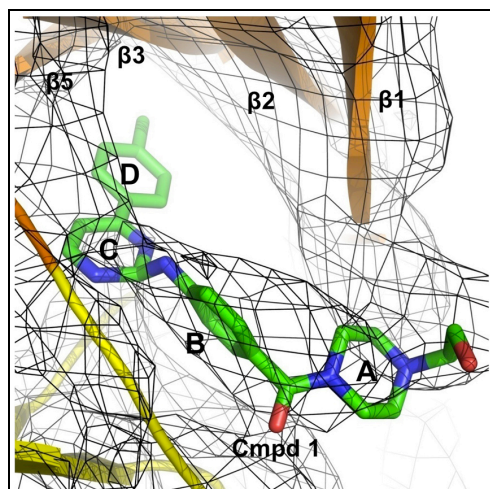

**Supplementary Figure 7.** Superposition among the 4 non-crystallographic xIKK $\beta$  dimers in the P1 space group and the 1 crystallographic xIKK $\beta$  dimer in the I4<sub>1</sub>22 space group

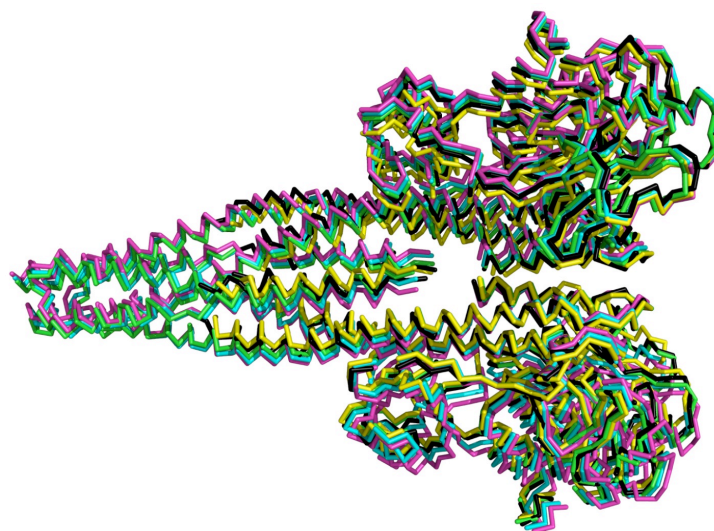



**Supplementary Figure 8.** SDS-PAGE of washed xIKK $\beta$  crystals in the I4<sub>1</sub>22 space group

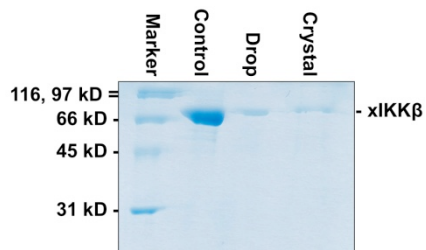

**Supplementary Figure 9.** A model of the full IKK complex dimer showing the possibly extremely elongated nature of the complex

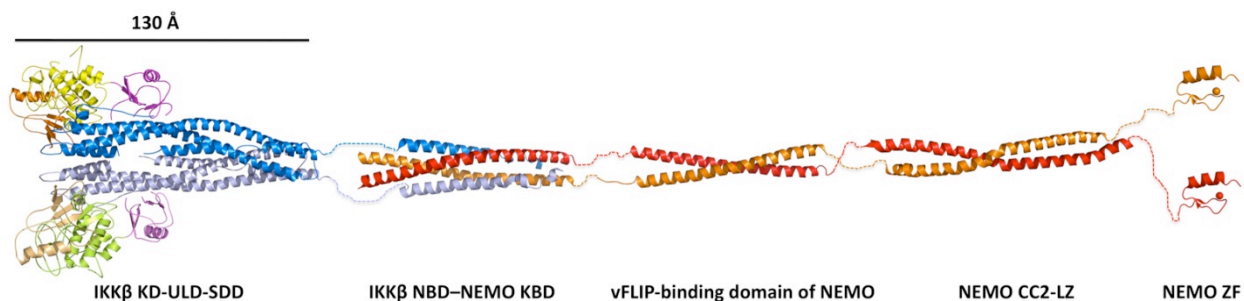

**Supplementary Figure 10.** Superposition of the 2 non-crystallographic xIKK $\beta$  tetramers in the P1 space group and the 1 crystallographic xIKK $\beta$  tetramer in the I4<sub>1</sub>22 space group

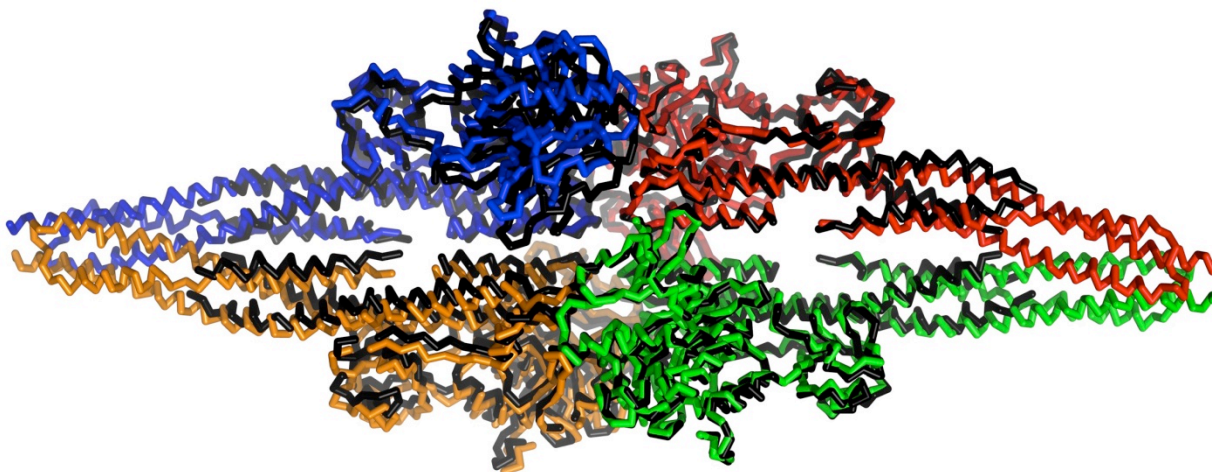

Supplement: NIHMS265556-supplement-1.pdf [file NIHMS265556-supplement-1.pdf]
